# Supplementary material
Source: Copernicus journal article supplement (doi:10.5194/bg-23-4187-2026)
Supplement: Supplementary file [file bg-23-4187-2026-supplement-title-page.pdf › bg-23-4187-2026-supplement-title-page.pdf]

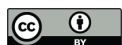

## *Supplement of*

# **Experimental assessment of benthic foraminifera as salinity bioindicators: Integrating morphological and eDNA approaches**

**Yifei Cao et al.**

*Correspondence to:* Yanli Lei (leiyanli@qdio.ac.cn)

- [bg-23-4187-2026-supplement-title-page.pdf](#)
- Supplementary Materials
  - 1. Supplementary Materials Description.docx
  - 2. Supplementary Figure S1.pdf
  - 3. Supplementary Tables.xlsx

The copyright of individual parts of the supplement might differ from the article licence.
