# Supplementary material
Source: Copernicus journal article supplement (doi:10.5194/bg-23-4187-2026)

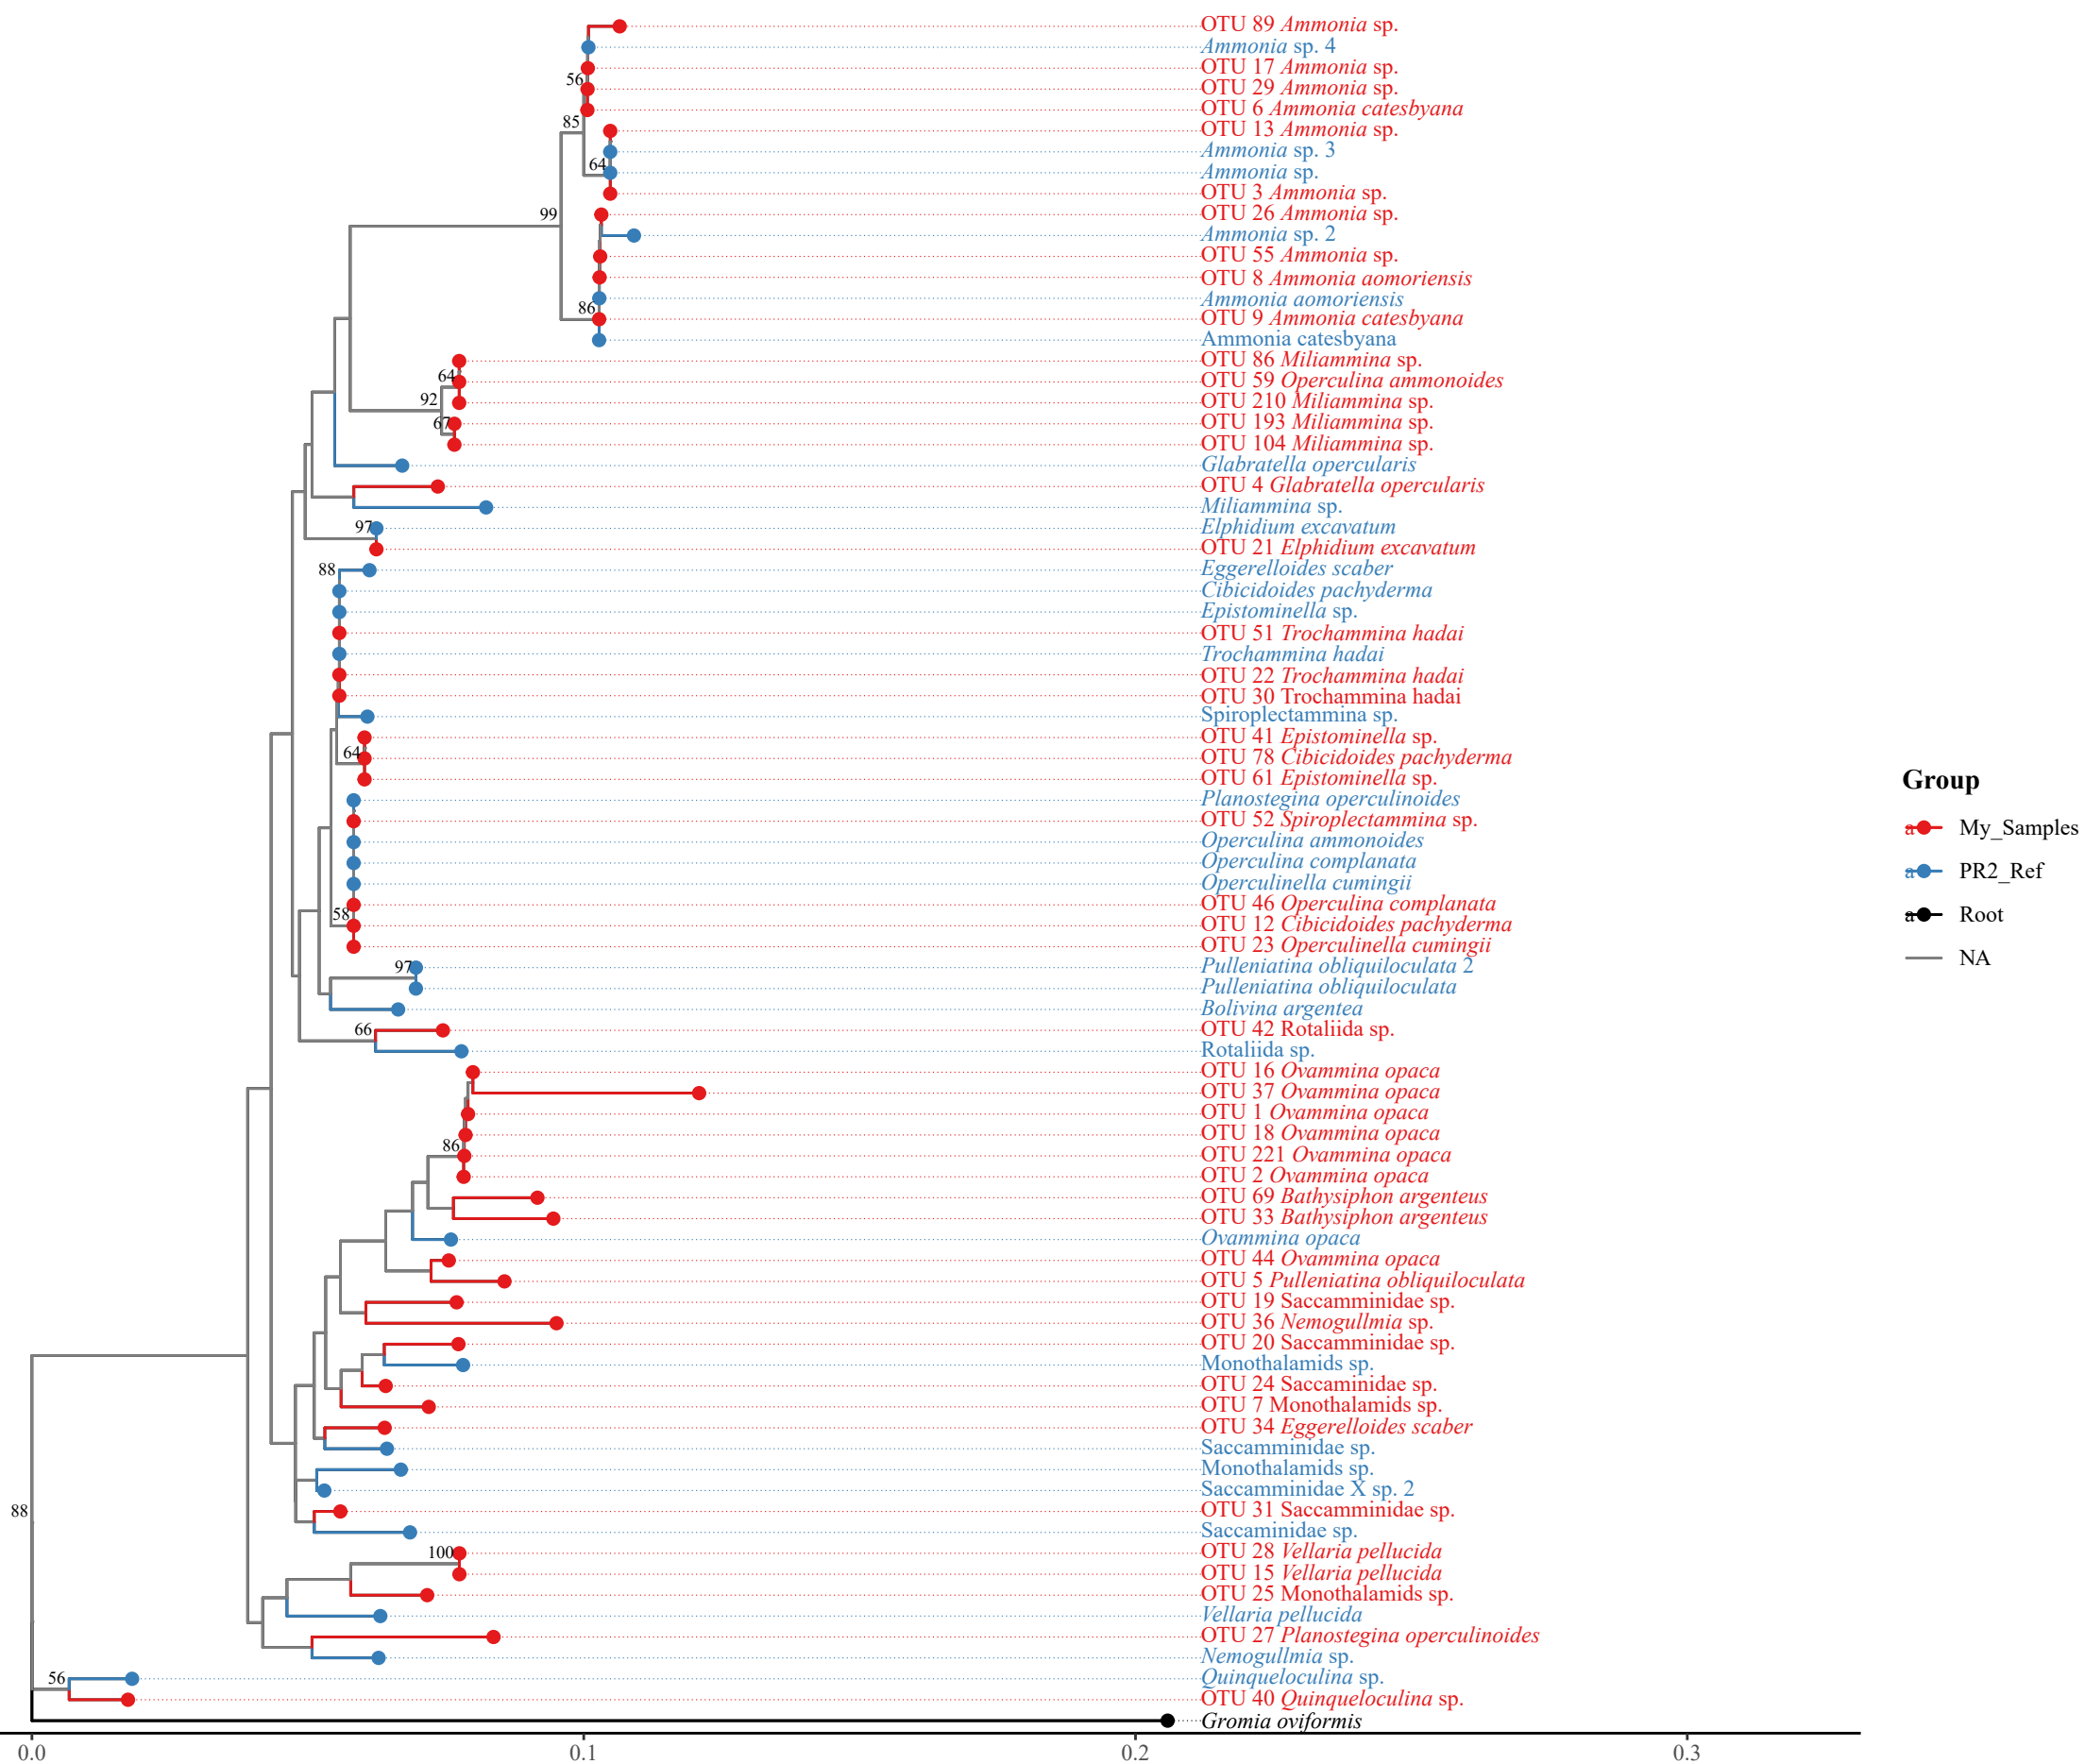

Values at nodes represent bootstrap support (>50%, 1000 replicates).

Supplement: Supplementary file 1 [file 2. Supplementary Figure S1.pdf › Supplementary Materials/2. Supplementary Figure S1.pdf]
